# Supplementary material for: Friedelin Synthase from Maytenus ilicifolia: Leucine 482 Plays an Essential Role in the Production of the Most Rearranged Pentacyclic Triterpene
Source: PubMed Central journal article supplement (PMC5118845; doi:10.1038/srep36858), 2016-11-22
Supplement: srep36858-s1.pdf [file srep36858-s1.pdf]

## Supplementary information

**Friedelin Synthase from *Maytenus ilicifolia*:**

**Leucine 482 Plays an Essential Role in the Production of the Most Rearranged Pentacyclic  
Triterpene**

Tatiana M. Souza-Moreira, Thaís B. Alves, Karina A. Pinheiro, Lidiane G. Felipe, Gustavo M.

A. De Lima, Tatiana F. Watanabe, Cristina C. Barbosa, Vânia A. F. F. M. Santos, Norberto P.

Lopes, Sandro R. Valentini, Rafael V. C. Guido, Maysa Furlan, Cleslei F. Zanelli

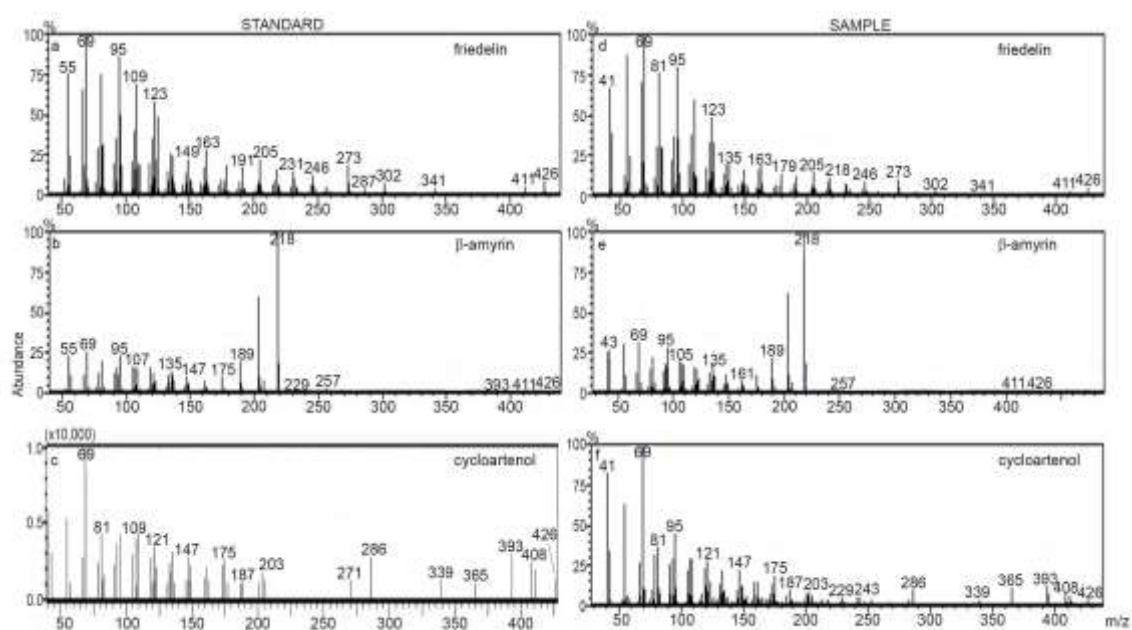

**Supplementary Figure S1.** The mass spectra for the triterpenoids analysed in this work. The fragmentation patterns of the standards (a) friedelin, (b) cycloartenol and (c)  $\beta$ -amyryn.

Triterpene compounds produced by *Saccharomyces cerevisiae* heterologously expressing the plant oxidosqualene cyclases ((d) friedelin, (e) cycloartenol and (d)  $\beta$ -amyryn) show similar fragmentation patterns as standards. Mass spectrum of standard cycloartenol was obtained from the NIST08 library.

|        |     |                   |
|--------|-----|-------------------|
| PEN5   | 481 | GLPISDGTAESECC    |
| PEN6   | 486 | GWPEVS DCTAESECC  |
| PEN1   | 485 | GWPEVS DCTAEGLKCC |
| PEN4   | 485 | GWPEVS DCTAESECC  |
| LcOSC2 | 477 | GWPEVS DCTSEGLRVA |
| MiCAS2 | 441 | GWPEVS DCTAEGLRAV |
| BPX1   | 487 | GWPEVS DCTAEGLRAV |
| MiCAS1 | 482 | GWPEVS DCTAEGLRAA |
| KdCAS  | 478 | GWPEVS DCTAEGLRVV |
| CAS1   | 477 | GWPEVS DCTAEGLRAA |
| PNX    | 477 | GWPEVS DCTAEGLRAV |
| PSX    | 477 | GWPEVS DCTAEGLRAV |
| OSC5   | 477 | GWPEVS DCTAEGLRAI |
| GgCAS1 | 477 | GWPEVS DCTAEGLRAV |
| BPW    | 476 | GWQVS DCTAEGLRVA  |
| OSC3   | 476 | GWQVS DCTAEGLRVA  |
| GgLUS1 | 476 | GWQVS DCTAEGLRAA  |
| OEW    | 477 | GWQVS DCTAEGLRAA  |
| TRW    | 479 | GWQVS DCTAEGLRVS  |
| RsM2   | 481 | GVIAIDCTAESECC    |
| LcIMS1 | 476 | GWQVS DCTAENLKCC  |
| MiFRS  | 478 | GWQVS DCTAENLKCC  |
| LUP1   | 477 | GWQVS DCTAENLKCC  |
| LUP2   | 480 | GWQVS DCTAENLKCC  |
| RcLUS  | 478 | GWQVS DCTAENLKCC  |
| BgLUS  | 478 | GWQVS DCTAENLKCC  |
| KcMS   | 478 | GWQVS DCTAENLKCC  |
| KdFRS  | 479 | GWQVS DCTAENLKCC  |
| KdGLS  | 479 | GWQVS DCTAENLKCC  |
| KdLUS  | 479 | GWQVS DCTAENLKCC  |
| PNY1   | 480 | GWQVS DCTAENLKCC  |
| PNY2   | 478 | GWQVS DCTAENLKCC  |
| EIAS   | 479 | GWQVS DCTAENLKCC  |
| RsM1   | 479 | GWQVS DCTAENLKCC  |
| BPY    | 479 | GWQVS DCTAENLKCC  |
| KdTAS  | 498 | GWQVS DCTAENLKCC  |
| PSM    | 479 | GWQVS DCTAENLKCC  |
| AMY2   | 479 | GWQVS DCTAENLKCC  |
| PSY    | 479 | GWQVS DCTAENLKCC  |
| AMY1   | 479 | GWQVS DCTAENLKCC  |
| GgbAS1 | 479 | GWQVS DCTAENLKCC  |
| OSC1   | 479 | GWQVS DCTAENLKCC  |

**Supplementary Figure S2.** The alignment of the different oxidosqualene cyclases (OSCs) around the Asp-Cys-Thr-Ala-Glu (DCTAE) conserved motif in the catalytic site. The leucine 2 positions before the DCTAE motif is present only in the friedelin-synthesizing enzymes. The alignment was performed using CLUSTALW (<http://www.ebi.ac.uk/Tools/msa/clustalw2/>). The oxidosqualene cyclase (OSC) identification and accession numbers are shown in Supplemental Table 3.

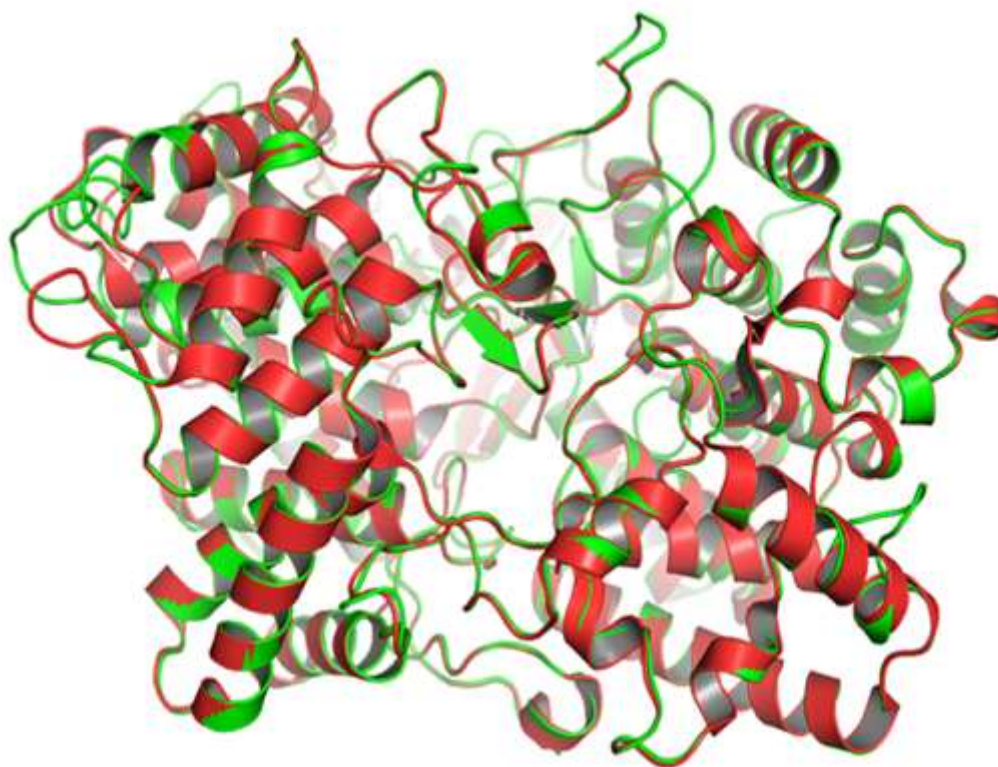

**Supplementary Figure S3.** The structural overlay of the friedelin synthase from *Maytenus ilicifolia* (MiFRS, green, homology model) and human OSCs (red, template).

**Supplementary Table S1.** The features of the cloned OSC sequences and their translated protein sequences.

| <b>ORF name</b>                       | <b><i>MiFRS</i></b>                 | <b><i>MiCAS1</i></b>             |
|---------------------------------------|-------------------------------------|----------------------------------|
| <b>ORF length</b>                     | 2316 bp                             | 2289 bp                          |
| <b>AA length</b>                      | 771                                 | 762                              |
| <b>Predicted MW</b>                   | 89.2 kDa                            | 86.8 kDa                         |
| <b>Predicted pI</b>                   | 6.04                                | 5.88                             |
| <b>Identity to each other</b>         | 52% <i>MiCAS1</i>                   | -                                |
| <b>Highest protein Blast identity</b> | 65-71%<br>$\beta$ -amyrin synthases | 72-81% cycloartenol<br>synthases |

*MiFRS* = friedelin synthase from *Maytenus ilicifolia*; *MiCAS1* cycloartenol synthase 1 from

*Maytenus ilicifolia*; bp = base pair; kDa = kilo daltons.

**Supplementary Table S2.** 1D NMR spectral data of friedelin (CDCl<sub>3</sub>, 14.1T).

| Position | <sup>13</sup> C* | <sup>1</sup> H                  |
|----------|------------------|---------------------------------|
| 1        | 22.3             | 1.97 (m)                        |
| 2        | 41.5             | 2.38 (m)                        |
| 3        | 213.3            | ---                             |
| 4        | 58.2             | 2.25 (m)                        |
| 5        | 42.1             | ---                             |
| 6        | 41.2             | 1.28 / 1.77 (m)                 |
| 7        | 18.2             | 1.40 (m) / 1.50 (m)             |
| 8        | 53.1             | 1.40 (m)                        |
| 9        | 37.4             | ---                             |
| 10       | 59.4             | 1.53 (dd, <i>J</i> = 2.5, 12.5) |
| 11       | 35.6             | 1.26 (m) / 1.48 (m)             |
| 12       | 30.5             | 1.19 (m) / 1.35 (m)             |
| 13       | 39.7             | ---                             |
| 14       | 38.3             | ---                             |
| 15       | 32.4             | 1.28 (m) / 1.50 (m)             |
| 16       | 36.0             | 1.36 (m) / 1.58 (m)             |
| 17       | 30.0             | ---                             |
| 18       | 42.8             | 1.57 (d, <i>J</i> = 5.0)        |
| 19       | 35.3             | 1.21(m) / 1.38 (m)              |
| 20       | 28.1             | ---                             |
| 21       | 32.7             | 1.53 (m) / 1.30 (m)             |
| 22       | 39.2             | 0.94 (m) / 1.51(m)              |
| 23       | 6.8              | 1.00 (d, <i>J</i> = 6.8)        |
| 24       | 14.6             | 0.73 (s)                        |

**Supplementary Table S2. Continuation**

---

|           |      |          |
|-----------|------|----------|
| <b>25</b> | 17.9 | 0.87 (s) |
| <b>26</b> | 20.2 | 0.88 (s) |
| <b>27</b> | 18.6 | 1.05 (s) |
| <b>28</b> | 32.1 | 1.18 (s) |
| <b>29</b> | 35.0 | 0.95 (s) |
| <b>30</b> | 31.8 | 1.01 (s) |

---

\* Spectral data is in accordance to the literature<sup>1</sup>.

**Supplementary Table S3.** The primers used in this study.

| Name                                   | Sequence 5' - 3'                     | Target  | Notes              |
|----------------------------------------|--------------------------------------|---------|--------------------|
| <b>Primers for cloning of the OSCs</b> |                                      |         |                    |
| Core amplification                     |                                      |         |                    |
| TS1F <sup>2</sup>                      | TTYGGNWDGYCARNHRTGGGAT <sup>1</sup>  | PTS     | Degenerated        |
| CS1F <sup>2</sup>                      | TAYAATGGMAGYCARYTVTGGGA <sup>1</sup> | CAS     | Degenerated        |
| CS1R <sup>2</sup>                      | TRRCTYTCHCYCCAHCACC <sup>1</sup>     | CAS/PTS | Degenerated        |
| Core sequence extension                |                                      |         |                    |
| BWN1F <sup>2</sup>                     | CARWAYRDDGAYGGNGGNTGGG <sup>1</sup>  | all     | Degenerated        |
| GSP1R                                  | GAGTAGGAGCTACTTCATCTGTGAG            | MiFRS   |                    |
| GSP3R                                  | GACACAGACCATACTCTTCAAC               | MiCAS1  |                    |
| 3'RACE                                 |                                      |         |                    |
| GSP1F                                  | GGAGGGCTAGCAGCAGCTGG                 | MiFRS   |                    |
| GSP3F                                  | AGGGGCTTGTAGCAGCTGGG                 | MiCAS1  |                    |
| NGSP1F                                 | TGTCAGGCTGTGCGCAGAG                  | MiFRS   | Nested PCR         |
| NGSP3F                                 | AGCCTTCGTAAGGCTTGCGC                 | MiCAS1  | Nested PCR         |
| AUAP                                   | GGCCACGCGTCGACTAGTAC                 | all     |                    |
| 5'-end RACE                            |                                      |         |                    |
| GSP5R                                  | GCATCTTCGTCTGGTCCCCTC                | MiFRS   | cDNA               |
| GSP7R                                  | GTCCAAGATCCATTTCTTCC                 | MiCAS1  | cDNA               |
| GSP9R                                  | GCAAACATAAGTGAATGCTGTGGC             | MiFRS   |                    |
| GSP11R                                 | CACCCTCTCCACCCTCAG                   | MiCAS1  |                    |
| NGSP5R                                 | GCAAACACTGTGCTGTGTCCC                | MiFRS   | Nested PCR         |
| NGSP7R                                 | AGCAACCTCAAAGTGACATAGTTC             | MiCAS1  | Nested PCR         |
| AUAP                                   | GGCCACGCGTCGACTAGTAC                 | all     |                    |
| Full length cDNAs                      |                                      |         |                    |
| MiFRS1F                                | CGCGGATCCATCATGTGGAAGATAAAGATTGC     | MiFRS   | <i>Bam</i> HI site |
| MiFRS1R                                | CGGAATTCCTGTGTAAGTGGACATATCATATGA    | MiFRS   | <i>Eco</i> RI site |
| MiCAS1F                                | CGCGGATCCGCGACAATGTGGAGGCTCAAATT     | MiCAS1  | <i>Bam</i> HI site |
| MiCAS1R                                | TGCTCTAGACAAATTCAAAGAGACTGTAATAC     | MiCAS1  | <i>Xba</i> I site  |
| <b>q-RT-PCR</b>                        |                                      |         |                    |
| MI40SF                                 | TCCTCTTGACCTGATTTGGG                 | 40S     |                    |
| MI40SR                                 | ACTTTTGGGGGATGGACTTC                 | 40S     |                    |
| RTMiFRS1F                              | CCTCCAAGAGCCAAAACTG                  | MiFRS   |                    |
| RTMiFRS1R                              | CCATAGGGTTGAGCATCTCC                 | MiFRS   |                    |
| RTMiCAS1F                              | GTTGGGGAACCTTTGGATG                  | MiCAS1  |                    |
| RTMiCAS1R                              | GTTGCAAACCCACCATCAG                  | MiCAS1  |                    |
| <b>Site-directed mutagenesis</b>       |                                      |         |                    |
| L482IF                                 | GATCATGGATGGCAAATTTCTGATTGCACTG      | MiFRS   |                    |
| L482IR                                 | CAGTGCAATCAGAAATTTGCCATCCATGATC      | MiFRS   |                    |
| L482TF                                 | GATCATGGATGGCAAACCTTCTGATTGCACTGC    | MiFRS   |                    |
| L482TR                                 | GCAGTGCAATCAGAAAGTTTGCCATCCATGATC    | MiFRS   |                    |
| L482VF                                 | GATCATGGATGGCAAAGTTTCTGATTGCACTG     | MiFRS   |                    |
| L482VR                                 | CAGTGCAATCAGAAACTTGGCCATCCATGATC     | MiFRS   |                    |

The letter F or R at the end of the name of each primer indicates if the primer is forward or reverse, respectively. PTS = pentacyclic triterpene synthase. CAS = cycloartenol synthase. GSP



= gene specific primer; NGSP = nested gene specific primer. Endonuclease restriction sites are underlined. Changed codons in the primers for site-directed mutagenesis are in bold.

**Supplementary Table S4.** The sequences used in the phylogenetic analysis with their GenBank accession number, species and function.

| <b>Accession number</b> | <b>Species</b>              | <b>Function</b>                                 |
|-------------------------|-----------------------------|-------------------------------------------------|
| AB257562.1              | <i>Arabidopsis thaliana</i> | Arabidiol synthase (PEN1)                       |
| AY327541.1              | <i>Arabidopsis thaliana</i> | Thalianol synthase (PEN4)                       |
| BT020456.1              | <i>Arabidopsis thaliana</i> | Marneral synthase (PEN5)                        |
| AB274959.1              | <i>Arabidopsis thaliana</i> | Multifunctional triterpene synthase (PEN6)      |
| NM_179572.1             | <i>Arabidopsis thaliana</i> | Lupeol synthase 1 (LUP1)                        |
| NM_106545.3             | <i>Arabidopsis thaliana</i> | Lupeol synthase 2 (LUP2)                        |
| NM_126681.2             | <i>Arabidopsis thaliana</i> | Cycloartenol synthase (CAS1)                    |
| AB263204.1              | <i>Rhizophora stylosa</i>   | Multifunctional triterpene synthase (RsM2)      |
| AB289586.1              | <i>Bruguiera gymnorhiza</i> | Lupeol synthase (BgLUS)                         |
| AB257507.1              | <i>Kandelia candel</i>      | Multifunctional triterpene synthase (KcMS)      |
| DQ268869.1              | <i>Ricinus communis</i>     | Lupeol synthase (RcLUS)                         |
| AB058643.1              | <i>Luffa cylindrica</i>     | Isomultiflorenol synthase (LcIMS1)              |
| AB037203.1              | <i>Glycyrrhiza glabra</i>   | $\beta$ -amyrin synthase (GgbAS1)               |
| AB181244.1              | <i>Lotus japonicus</i>      | $\beta$ -amyrin synthase (OSC1)                 |
| AB034802.1              | <i>Pisum sativum</i>        | $\beta$ -amyrin synthase (PSY)                  |
| AF478453.1              | <i>Medicago truncatula</i>  | $\beta$ -amyrin synthase (AMY1)                 |
| AF478455.1              | <i>Lotus japonicus</i>      | Multifunctional $\beta$ -amyrin synthase (AMY2) |
| AB034803.2              | <i>Pisum sativum</i>        | Mixed-amyrin synthase (PSM)                     |

**Supplementary Table S4. Continuation**

---

|            |                                 |                                               |
|------------|---------------------------------|-----------------------------------------------|
| AB009030.1 | <i>Panax ginseng</i>            | $\beta$ -amyrin synthase (PNY1)               |
| AB014057.1 | <i>Panax ginseng</i>            | $\beta$ -amyrin synthase (PNY2)               |
| AB055512.1 | <i>Betula platyphylla</i>       | $\beta$ -amyrin synthase (BPY)                |
| HM623868.1 | <i>Kalanchoe daigremontiana</i> | Taraxerol synthase (KdTAS)                    |
| AB263203.1 | <i>Rhizophora stylosa</i>       | Multifunctional triterpene synthase<br>(RsM1) |
| AB206469.1 | <i>Medicago tirucalli</i>       | $\beta$ -amyrin synthase (EtAS)               |
| HM623870.1 | <i>Kalanchoe daigremontiana</i> | Friedelin synthase (KdFRS)                    |
| HM623869.1 | <i>Kalanchoe daigremontiana</i> | Glutinol synthase (KdGLS)                     |
| HM623871.1 | <i>Kalanchoe daigremontiana</i> | Lupeol synthase (KdLUS)                       |
| AB025343.1 | <i>Olea europaea</i>            | Lupeol synthase (OEW)                         |
| AB025345.1 | <i>Taraxacum officinale</i>     | Lupeol synthase (TRW)                         |
| AB181245.1 | <i>Lotus japonicus</i>          | Lupeol synthase (OSC3)                        |
| AB116228.1 | <i>Glycyrrhiza glabra</i>       | Lupeol synthase (GgLUS1)                      |
| AB055511.1 | <i>Betula platyphylla</i>       | Lupeol synthase (BPW)                         |
| AB181246.1 | <i>Lotus japonicus</i>          | Cycloartenol synthase (OSC5)                  |
| AB025968.1 | <i>Glycyrrhiza glabra</i>       | Cycloartenol synthase (GgCAS1)                |
| D89619.1   | <i>Pisum sativum</i>            | Cycloartenol synthase (PSX)                   |
| AB009029.1 | <i>Panax ginseng</i>            | Cycloartenol synthase (PNX)                   |
| HM623872.1 | <i>Kalanchoe daigremontiana</i> | Cycloartenol synthase (KdCAS)                 |
| AB033335.1 | <i>Luffa cylindrica</i>         | Cycloartenol synthase (LcCAS1)                |
| AB055509.1 | <i>Betula platyphylla</i>       | Cycloartenol synthase (BPX1)                  |
|            | <i>Maytenus ilicifolia</i>      | Friedelin synthase (MiFRS)                    |
|            | <i>Maytenus ilicifolia</i>      | Cycloartenol synthase (MiCAS1)                |
|            | <i>Maytenus ilicifolia</i>      | Cycloartenol synthase (MiCAS2)                |

---

## REFERENCES

- 1 Oliveira, D. M. *et al.* Combined experimental powder X-ray diffraction and DFT data to obtain the lowest energy molecular conformation of friedelin. *Quím. Nova* **35**, 1916-1921, (2012).
- 2 Guhling, O., Hobl, B., Yeats, T. & Jetter, R. Cloning and characterization of a lupeol synthase involved in the synthesis of epicuticular wax crystals on stem and hypocotyl surfaces of *Ricinus communis*. *Arch Biochem Biophys* **448**, 60-72 (2006).
